# Supplementary material for: Synthetic Thermo-Responsive Terpolymers as Tunable Scaffolds for Cell Culture Applications
Source: MDPI journal article supplement (doi:10.3390/polym14204379), 2022-10-17
Supplement: s1 [file s1]

## 1. Terpolymer Characterization

**Table S1:**  $^1\text{H}$ -NMR average number molecular weight (Mn) and PEG repetitive units (n) present on samples of synthesized P400 terpolymer combinations.

| Reactors       | 2:3:95_P400    | 2:4:94_P400    | 4:4:92_P400    | 4:8:88_P400    | 4:12:84_P400   |
|----------------|----------------|----------------|----------------|----------------|----------------|
| <i>R1</i>      | 4013.10        | 2646.35        | 2788.86        | 1592.84        | 1194.07        |
| <i>R2</i>      | 3255.51        | 2854.65        | 2637.21        | 1648.25        | 1223.93        |
| <i>R3</i>      | 3485.35        | 2751.00        | 2595.88        | 1633.90        | 1243.60        |
| <i>R4</i>      | 2468.33        | 1873.39        | 3335.88        | 1757.02        | 1231.40        |
| <i>R5</i>      | 3543.34        | 2854.01        | 2821.58        | 1752.35        | 1217.57        |
| <i>R6</i>      | NA             | NA             | NA             | 1584.13        | 1252.35        |
| <b>Average</b> | <b>3353.12</b> | <b>2595.88</b> | <b>2835.88</b> | <b>1661.42</b> | <b>1233.77</b> |
| <b>STDEV</b>   | <b>566.04</b>  | <b>412.97</b>  | <b>295.59</b>  | <b>76.17</b>   | <b>14.20</b>   |
| <b>n</b>       | <b>5</b>       | <b>5</b>       | <b>5</b>       | <b>6</b>       | <b>6</b>       |
| <b>SEM</b>     | <b>253.14</b>  | <b>184.69</b>  | <b>132.19</b>  | <b>31.10</b>   | <b>5.80</b>    |

**Table S2:**  $^1\text{H}$ -NMR average number molecular weight (Mn) and PEG repetitive units (n) present on samples of synthesized P1000 terpolymer combinations.

| Reactors       | 2:3:95_P1000   | 2:4:94_P1000   | 4:4:92_P1000   | 10:4:86_P1000  |
|----------------|----------------|----------------|----------------|----------------|
| <i>R1</i>      | 4955.04        | 2014.86        | 3285.76        | 2591.46        |
| <i>R2</i>      | 3860.56        | 3452.76        | 3185.85        | 2608.15        |
| <i>R3</i>      | 3849.79        | 3157.25        | 3755.97        | 2682.78        |
| <i>R4</i>      | 3724.10        | 3377.70        | 3157.83        | 2599.30        |
| <i>R5</i>      | 4105.13        | 2594.90        | 3196.88        | 2515.46        |
| <i>R6</i>      | 3868.65        | 3370.99        | 1855.69        | 3141.09        |
| <b>Average</b> | <b>4060.55</b> | <b>3125.21</b> | <b>3316.46</b> | <b>2689.71</b> |
| <b>STDEV</b>   | <b>455.31</b>  | <b>368.06</b>  | <b>250.32</b>  | <b>227.44</b>  |
| <b>n</b>       | <b>6</b>       | <b>6</b>       | <b>6</b>       | <b>6</b>       |
| <b>SEM</b>     | <b>185.88</b>  | <b>150.26</b>  | <b>102.19</b>  | <b>92.85</b>   |

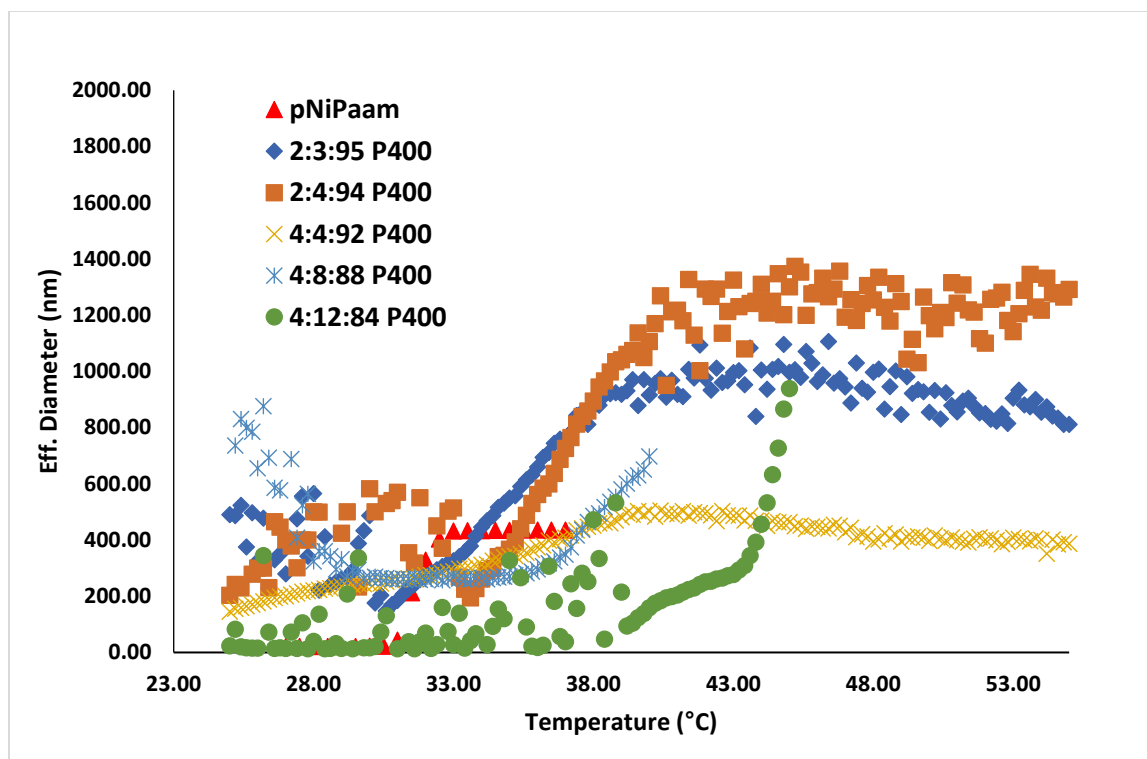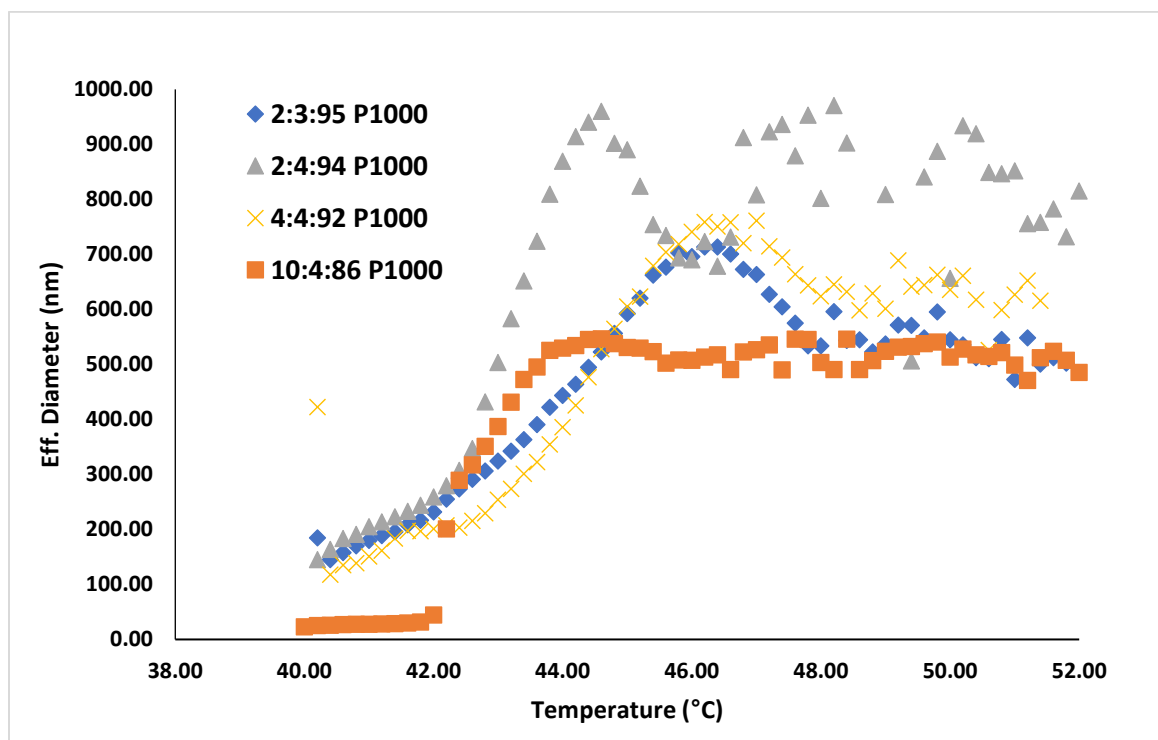

**Figure S1:** Effect of temperature on effective diameter of pNiPAAM as baseline and terpolymer with PEGMMA400 and PEGMMA1000 in synthesis.

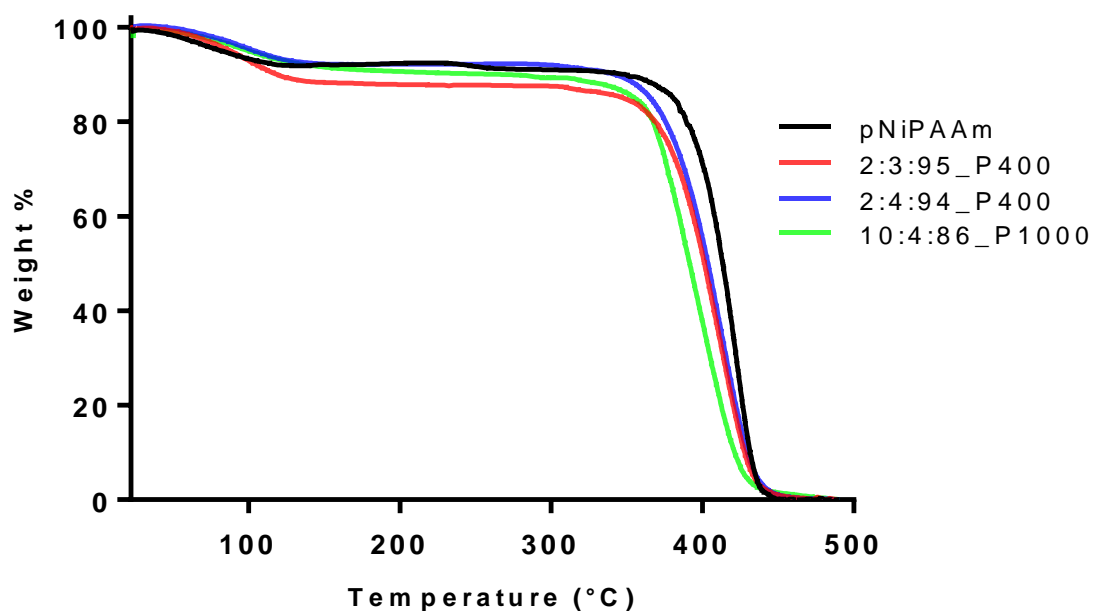

**Figure S2:** Thermal gravimetric analysis for pNiPAAm pure, 2:3:95\_P400, 2:4:94\_P400 and 10:4:86\_P1000 terpolymer combinations.

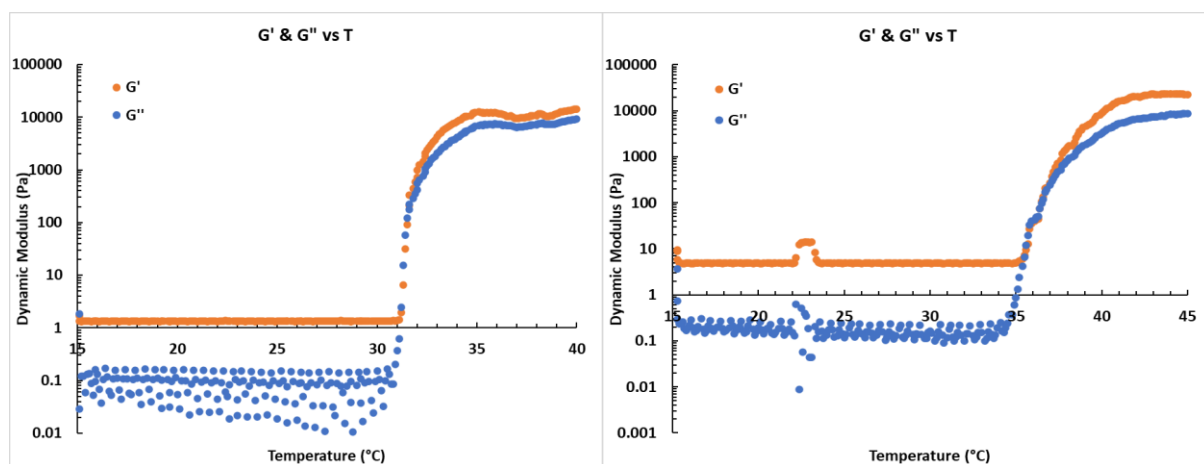

**Figure S3:** Dynamic modulus in function of temperature for pNiPAAm (left) and 2:3:95\_P400 (right) at 15wt%.

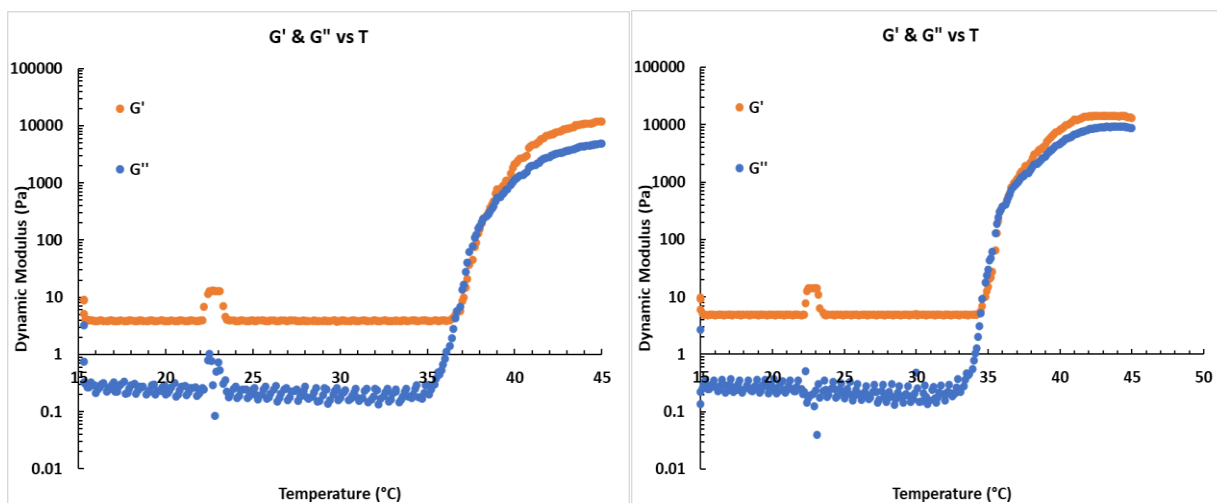

**Figure S4:** Dynamic modulus in function of temperature for 2:4:94\_P400 (left) and 4:4:92\_P400 (right) at 15wt%.

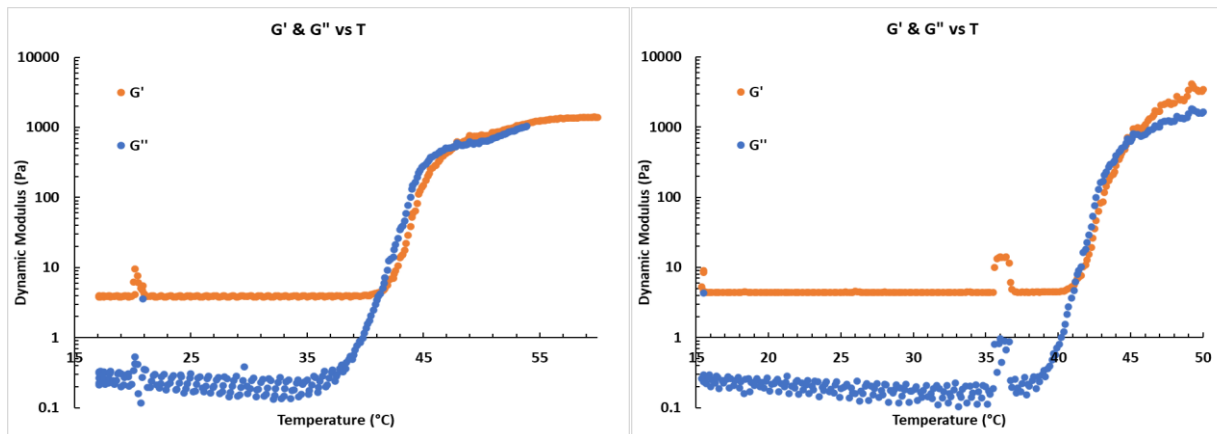

**Figure S5:** Dynamic modulus in function of temperature for 4:8:88\_P400 (left) and 4:12:84\_P400 (right) at 15wt%.

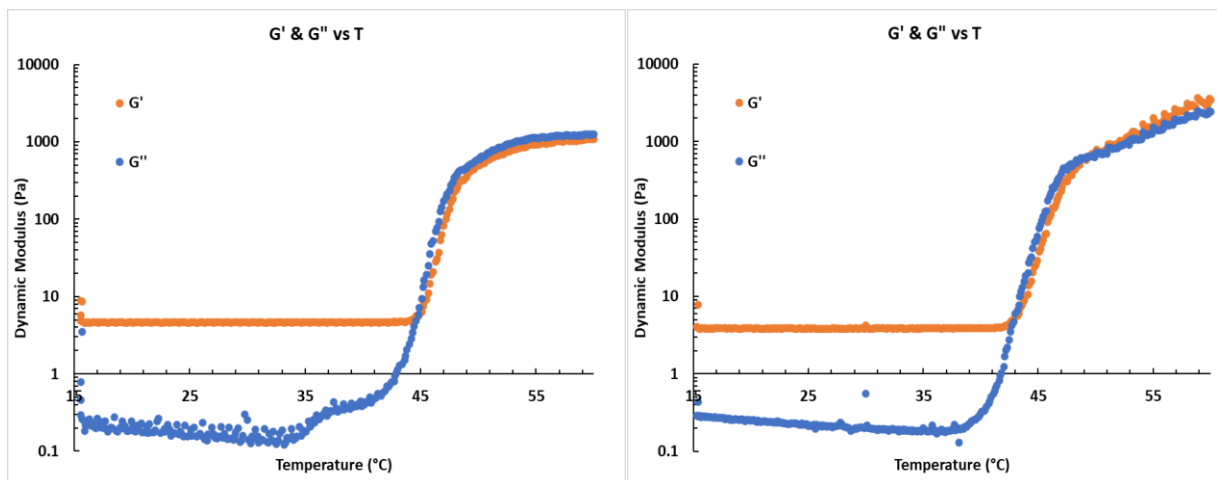

**Figure S6:** Dynamic modulus in function of temperature for 2:3:95\_P1000 (left) and 2:4:94\_P1000 (right) at 15wt%.

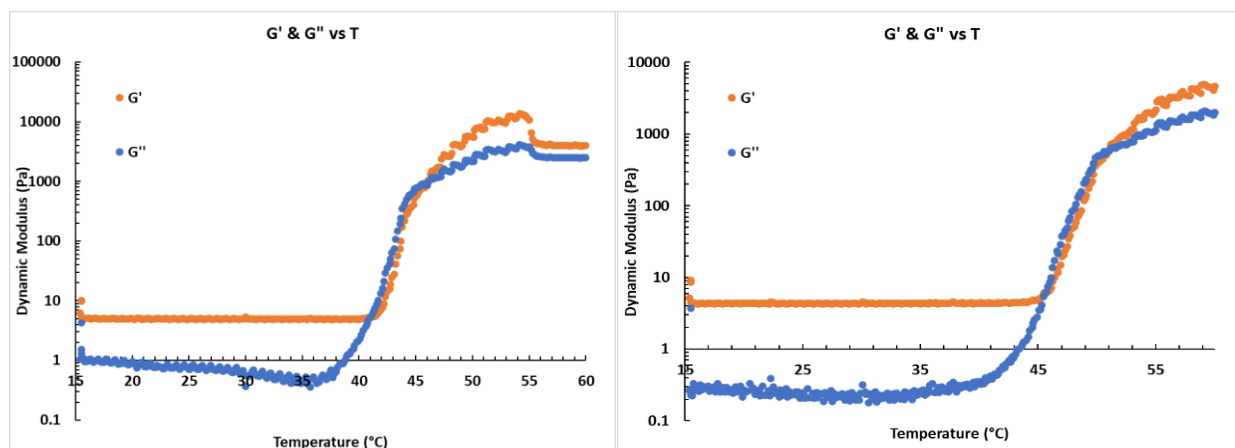

**Figure S7:** Dynamic modulus in function of temperature for 4:4:92\_P1000 (left) and 10:4:86\_P1000 (right) at 15wt%.

## 2. Cell culture

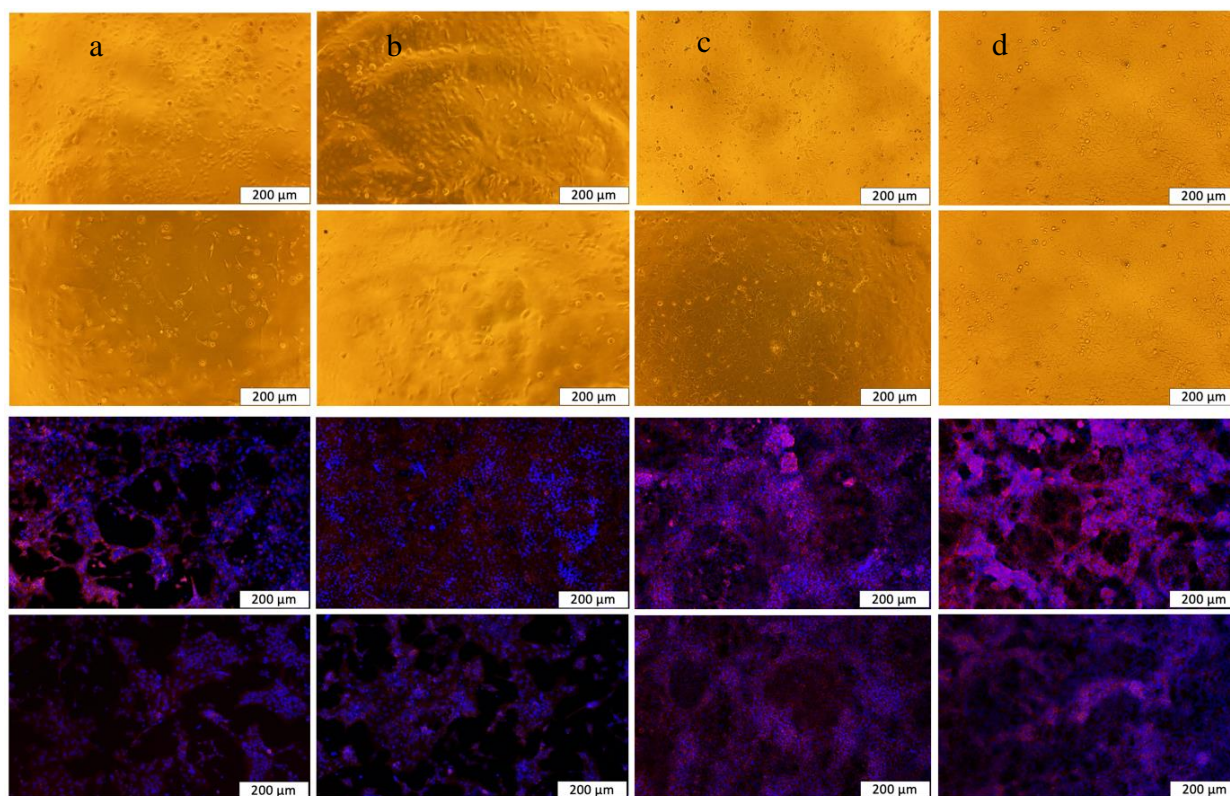

**Figure S8.** Mixing condition used to encapsulate SKOV-3 ovarian cancer cell line within terpolymer scaffolds. Cells appeared to fall to the bottom of the well before gelation was obtained, resulting in a 2D growth on the well surface. Rows show cells pictures inside 2:3:95\_P400 (a), 2:4:92\_P400 (b), 10:4:86\_P1000 terpolymers scaffolds and the control (d) without terpolymer. Pictures with yellow background were taken on day 4 of incubation, while the merged fluorescence pictures in day 10 of incubation. In both cases, pictures on the top and bottom columns represent

the scaffolds of 15 wt.% and 20 wt.%, respectively. The blue color represents the cell's nucleus, and the red color the cell's cytoskeleton.

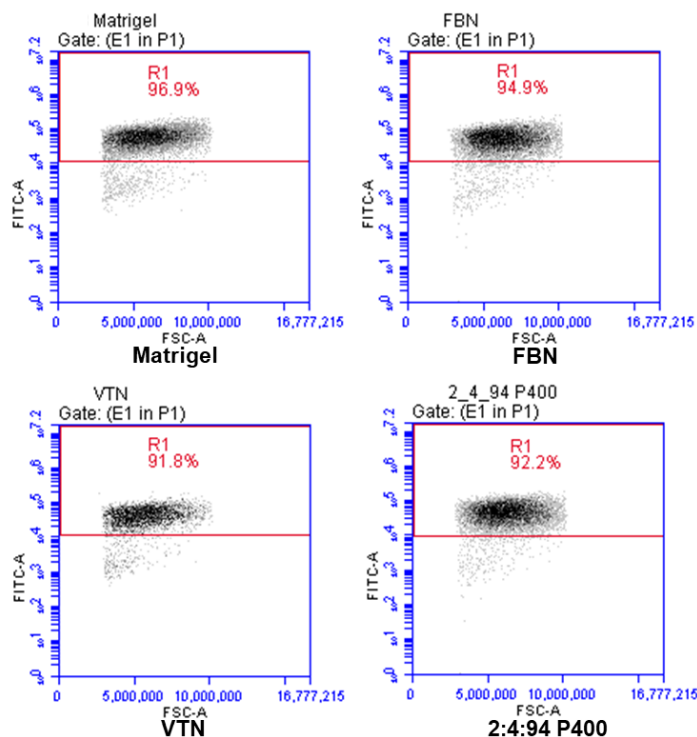

**Figure S9.** Pluripotency plots for Matrigel, Fibronectin (FBN), Vitronectin (VTN), and 2:4:94 P400 terpolymer combination.

### 3. Statistical analysis

#### 3.1. Filtration effects in terpolymer solution.

Three different batches, different days of synthesis, and random reactors, of 2:4:94\_P400 terpolymer combination, were used in this experiment. A solution of 40wt.% terpolymer in D.I water of each selected batch was prepared to be filtrated, and by differences in weight, evaluate the effect of the PES membrane used. A sample of 100  $\mu$ L was weight in triplicate before and after filtration to observe any effect by weight in the process. The results of samples weight, wet and dry (after the weekend), are shown in Tables 1 and 2, respectively.

Results were analyzed statistically in the Minitab program using a 2 sample T-Test analysis to find any significant difference in the results of the means before and after the filtration process by family batches. The null hypothesis of the T-Test indicated that the population means evaluated of the same family are the same, 06/20/2019\_R6 (R6), 07/22/2020\_composite (C), and 08/19/2020\_R4 (R4). In contrast, the alternative hypothesis affirms population means are different.

**Table S3:** Wet weight of 100  $\mu\text{L}$  samples of three different terpolymer batches, 06/20/2019\_R6 (R6), 07/22/2020\_composite (C), and 08/19/2020\_R4 (R4), before and after filtration using PES membrane.

| Sample ID   | R6-A    | R6-D    | C-A     | C-D     | R4-A    | R4-D    |
|-------------|---------|---------|---------|---------|---------|---------|
| Replicate 1 | 0.08030 | 0.08220 | 0.07610 | 0.07690 | 0.08050 | 0.08690 |
| Replicate 2 | 0.08020 | 0.07770 | 0.07760 | 0.07700 | 0.07730 | 0.07950 |
| Replicate 3 | 0.07940 | 0.08410 | 0.07510 | 0.07870 | 0.08250 | 0.07740 |
| Average     | 0.07997 | 0.08133 | 0.07627 | 0.07753 | 0.08010 | 0.08127 |
| STDEV       | 0.00049 | 0.00329 | 0.00126 | 0.00101 | 0.00262 | 0.00499 |

**Table S4:** Dry weight of 100  $\mu\text{L}$  samples of three different terpolymer batches, 06/20/2019\_R6 (R6), 07/22/2020\_composite (C), and 08/19/2020\_R4 (R4), before and after filtration using PES membrane.

| Sample ID   | R6-A_dry | R6-D_dry | C-A_dry | C-D_dry | R4-A_dry | R4-D_dry |
|-------------|----------|----------|---------|---------|----------|----------|
| Replicate 1 | 0.05080  | 0.05340  | 0.04710 | 0.04780 | 0.05080  | 0.05220  |
| Replicate 2 | 0.05200  | 0.05030  | 0.04770 | 0.04830 | 0.04920  | 0.05060  |
| Replicate 3 | 0.05090  | 0.05420  | 0.04690 | 0.04900 | 0.05180  | 0.04790  |
| Average     | 0.05123  | 0.05263  | 0.04723 | 0.04837 | 0.05060  | 0.05023  |
| STDEV       | 0.00067  | 0.00206  | 0.00042 | 0.00060 | 0.00131  | 0.00217  |

Since, in all cases, evaluate before and after filtration with wet and dry samples, the p-value is higher than 0.05, there is not enough evidence to reject the null hypothesis. For this reason, with 95% significance, we can affirm that the means of the study population are statistically equivalent. The T-Test results, including the Boxplot, are shown following:

#### Test

Null hypothesis  $H_0: \mu_1 - \mu_2 = 0$   
Alternative hypothesis  $H_1: \mu_1 - \mu_2 \neq 0$

| T-Value | DF | P-Value |
|---------|----|---------|
| -0.71   | 2  | 0.550   |

#### Test

Null hypothesis  $H_0: \mu_1 - \mu_2 = 0$   
Alternative hypothesis  $H_1: \mu_1 - \mu_2 \neq 0$

| T-Value | DF | P-Value |
|---------|----|---------|
| -1.12   | 2  | 0.379   |

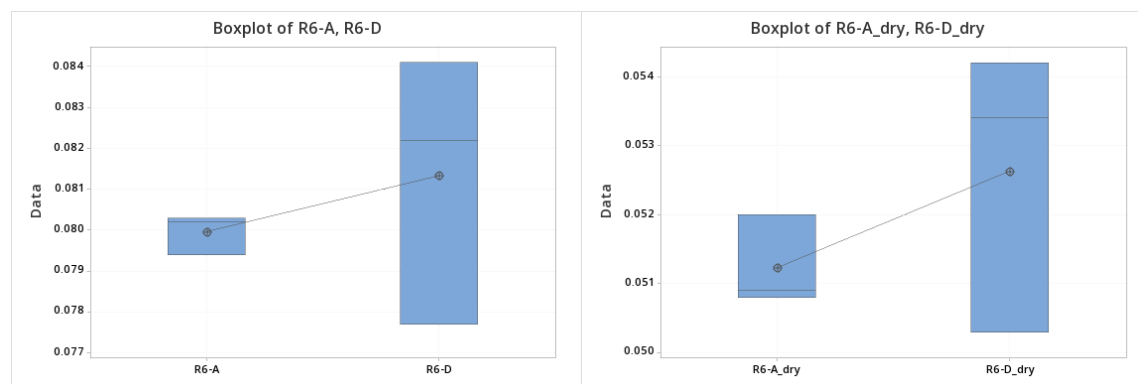

**Figure S10:** T-Test analysis in Minitab software of wet and dry weights results before and after filtration using the 06/20/2019\_R6 (R6) sample.

## Test

Null hypothesis  $H_0: \mu_1 - \mu_2 = 0$   
 Alternative hypothesis  $H_1: \mu_1 - \mu_2 \neq 0$

| T-Value | DF | P-Value |
|---------|----|---------|
| -1.36   | 3  | 0.267   |

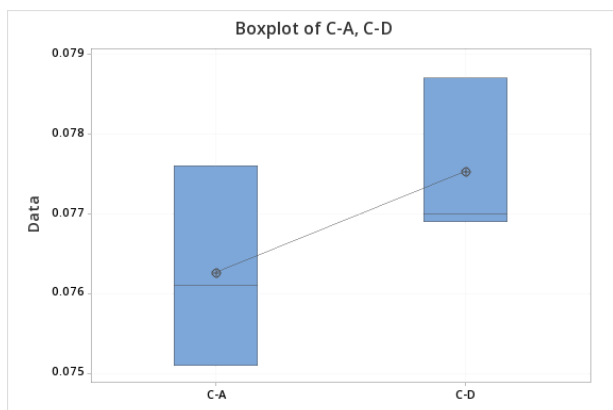

## Test

Null hypothesis  $H_0: \mu_1 - \mu_2 = 0$   
 Alternative hypothesis  $H_1: \mu_1 - \mu_2 \neq 0$

| T-Value | DF | P-Value |
|---------|----|---------|
| -2.68   | 3  | 0.075   |

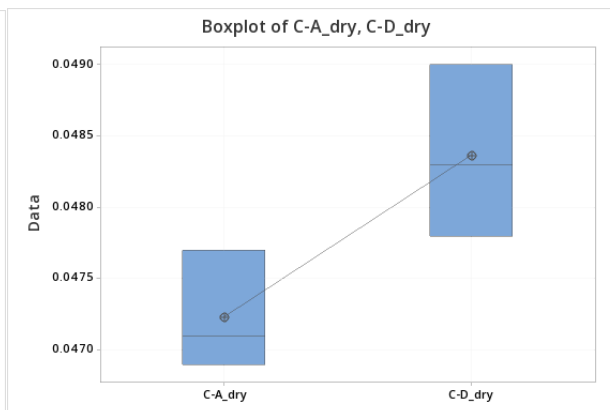

**Figure S11:** T-Test analysis in Minitab software of wet and dry weights results before and after filtration using a 07/22/2020\_composite (C) sample.

## Test

Null hypothesis  $H_0: \mu_1 - \mu_2 = 0$   
 Alternative hypothesis  $H_1: \mu_1 - \mu_2 \neq 0$

| T-Value | DF | P-Value |
|---------|----|---------|
| -0.36   | 3  | 0.744   |

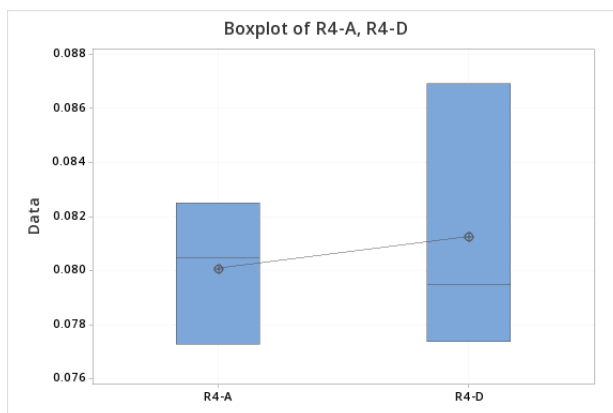

## Test

Null hypothesis  $H_0: \mu_1 - \mu_2 = 0$   
 Alternative hypothesis  $H_1: \mu_1 - \mu_2 \neq 0$

| T-Value | DF | P-Value |
|---------|----|---------|
| 0.25    | 3  | 0.819   |

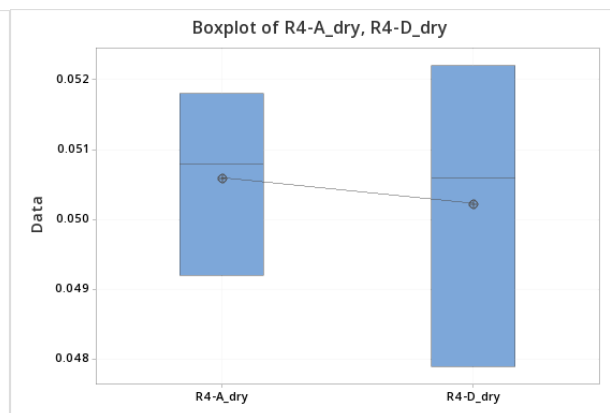

**Figure S12:** T-Test analysis in Minitab software of wet and dry weights results before and after filtration using the 08/19/2020\_R4 (R4) sample.

## 3.2. H-NMR data



### 3.2.1. Number average Molecular weight (Mn)

#### Molecular weight P400 terpolymers

| Tukey's multiple comparisons test | Mean Diff. | 95.00% CI of diff. | Summary | Adjusted P Value |
|-----------------------------------|------------|--------------------|---------|------------------|
| 2:3:95_P400 vs. 2:4:94_P400       | 757.2      | 144.7 to 1370      | *       | 0.0106           |
| 2:3:95_P400 vs. 4:4:92_P400       | 517.2      | -95.32 to 1130     | ns      | 0.1257           |
| 2:3:95_P400 vs. 4:8:88_P400       | 1692       | 1105 to 2278       | ****    | <0.0001          |
| 2:3:95_P400 vs. 4:12:84_P400      | 2126       | 1539 to 2712       | ****    | <0.0001          |
| 2:4:94_P400 vs. 4:4:92_P400       | -240.0     | -852.6 to 372.6    | ns      | 0.7719           |
| 2:4:94_P400 vs. 4:8:88_P400       | 934.5      | 348.0 to 1521      | ***     | 0.0009           |
| 2:4:94_P400 vs. 4:12:84_P400      | 1369       | 782.2 to 1955      | ****    | <0.0001          |
| 4:4:92_P400 vs. 4:8:88_P400       | 1174       | 588.0 to 1761      | ****    | <0.0001          |
| 4:4:92_P400 vs. 4:12:84_P400      | 1609       | 1022 to 2195       | ****    | <0.0001          |
| 4:8:88_P400 vs. 4:12:84_P400      | 434.3      | -124.9 to 993.5    | ns      | 0.1811           |

#### Molecular weight P1000 terpolymers

| Tukey's multiple comparisons test | Mean Diff. | 95.00% CI of diff. | Summary | Adjusted P Value |
|-----------------------------------|------------|--------------------|---------|------------------|
| 2:3:95_P1000 vs. 2:4:94_P1000     | 1066       | 260.4 to 1871      | **      | 0.0071           |
| 2:3:95_P1000 vs. 4:4:92_P1000     | 987.5      | 182.1 to 1793      | *       | 0.0129           |
| 2:3:95_P1000 vs. 10:4:86_P1000    | 1371       | 565.4 to 2176      | ***     | 0.0006           |
| 2:4:94_P1000 vs. 4:4:92_P1000     | -78.25     | -883.7 to 727.2    | ns      | 0.9927           |
| 2:4:94_P1000 vs. 10:4:86_P1000    | 305.0      | -500.4 to 1110     | ns      | 0.7169           |
| 4:4:92_P1000 vs. 10:4:86_P1000    | 383.3      | -422.1 to 1189     | ns      | 0.5543           |

**GP: 0.1234 (ns), 0.0332 (\*), 0.0021 (\*\*), 0.0002 (\*\*\*), <0.0001 (\*\*\*\*)**

#### Outliers P400 terpolymers

| Method                | 2:3:95_P400 | 2:4:94_P400 | 4:4:92_P400 | 4:8:88_P400 | 4:12:84_P400 |
|-----------------------|-------------|-------------|-------------|-------------|--------------|
| Grubbs (Alpha = 0.05) |             |             |             |             |              |
| Number of points      |             |             |             |             |              |
| # Y values analyzed   | 5           | 5           | 5           | 6           | 6            |
| Outliers              | 0           | 1           | 0           | 0           | 0            |
|                       |             | R4          |             |             |              |

| Method:             | 2:3:95_P400 | 2:4:94_P400 | 4:4:92_P400 | 4:8:88_P400 | 4:12:84_P400 |
|---------------------|-------------|-------------|-------------|-------------|--------------|
| ROUT (Q = 1%)       |             |             |             |             |              |
| Number of points    |             |             |             |             |              |
| # Y values analyzed | 5           | 5           | 5           | 6           | 6            |
| Outliers            | 0           | 0           | 0           | 0           | 0            |

#### Outliers P1000 terpolymers

|                       |              |              |              |               |
|-----------------------|--------------|--------------|--------------|---------------|
| Method                |              |              |              |               |
| Grubbs (Alpha = 0.05) | 2:3:95_P1000 | 2:4:94_P1000 | 4:4:92_P1000 | 10:4:86_P1000 |
| Number of points      |              |              |              |               |
| # Y values analyzed   | 6            | 6            | 6            | 6             |
| Outliers              | 1            | 0            | 1            | 1             |
|                       | R1           |              | R6           | R6            |

|                     |              |              |              |               |
|---------------------|--------------|--------------|--------------|---------------|
| Method:             |              |              |              |               |
| ROUT (Q = 1%)       | 2:3:95_P1000 | 2:4:94_P1000 | 4:4:92_P1000 | 10:4:86_P1000 |
| Number of points    |              |              |              |               |
| # Y values analyzed | 6            | 6            | 6            | 6             |
| Outliers            | 0            | 0            | 0            | 0             |

### 3.2.2. Molar composition

#### Outliers P400 terpolymers with the actual value

|                       |        |        |        |        |        |         |         |         |
|-----------------------|--------|--------|--------|--------|--------|---------|---------|---------|
| Method                | NiPAA  | NiPAA  | NiPAA  | 4-VPBA | P400   | NiPAA   | 4-VPBA  | P400    |
| Grubbs (Alpha = 0.05) | 2:3:95 | 4:4:92 | 4:8:88 | 4:8:88 | 4:8:88 | 4:12:84 | 4:12:84 | 4:12:84 |
| Number of points      |        |        |        |        |        |         |         |         |
| # Y values analyzed   | 6      | 6      | 7      | 7      | 7      | 7       | 7       | 7       |
| Outliers              | 1      | 1      | 1      | 1      | 1      | 1       | 1       | 1       |
|                       | R4     | Actual | Actual | Actual | Actual | Actual  | Actual  | Actual  |

|                     |        |        |        |         |         |
|---------------------|--------|--------|--------|---------|---------|
| Method:             | NiPAA  | NiPAA  | P400   | NiPAA   | P400    |
| ROUT (Q = 1%)       | 4:4:92 | 4:8:88 | 4:8:88 | 4:12:84 | 4:12:84 |
| Number of points    |        |        |        |         |         |
| # Y values analyzed | 6      | 7      | 7      | 7       | 7       |
| Outliers            | 1      | 1      | 1      | 1       | 1       |
|                     | Actual | Actual | Actual | Actual  | Actual  |

#### Outliers P1000 terpolymers with the actual value

|                       |        |        |        |         |         |         |
|-----------------------|--------|--------|--------|---------|---------|---------|
| Method                | P1000  | NiPAA  | 4-VPBA | NiPAA   | 4-VPBA  | P1000   |
| Grubbs (Alpha = 0.05) | 2:4:94 | 4:4:92 | 4:4:92 | 10:4:86 | 10:4:86 | 10:4:84 |
| Number of points      |        |        |        |         |         |         |
| # Y values analyzed   | 7      | 7      | 7      | 7       | 7       | 7       |
| Outliers              | 1      | 1      | 1      | 1       | 1       | 1       |
|                       | R3     | Actual | Actual | Actual  | Actual  | Actual  |

|               |        |        |        |         |         |
|---------------|--------|--------|--------|---------|---------|
| Method:       | P1000  | NiPAA  | 4-VPBA | NiPAA   | 4-VPBA  |
| ROUT (Q = 1%) | 2:4:94 | 4:4:92 | 4:4:92 | 10:4:86 | 10:4:86 |

|                                         |    |        |        |        |        |
|-----------------------------------------|----|--------|--------|--------|--------|
| Number of points<br># Y values analyzed | 7  | 7      | 7      | 7      | 7      |
| Outliers                                | 1  | 1      | 1      | 1      | 1      |
|                                         | R3 | Actual | Actual | Actual | Actual |
